# Supplementary material for: DNA replication protein Cdc45 directly interacts with PCNA via its PIP box in Leishmania donovani and the Cdc45 PIP box is essential for cell survival
Source: PubMed Central journal article supplement (PMC7255605; doi:10.1371/journal.ppat.1008190), 2020-05-15
Supplement: ppat.1008190.s001.pdf [file ppat.1008190.s001.pdf]

**S1 Table: Comparative analysis of flow cytometry profiles of *cdc45* knockout lines.**

| TABLE S1          |       |       |       |         |       |                 |       |       |       |         |       |                                 |              |                 |       |       |       |         |       |                                 |              |  |  |
|-------------------|-------|-------|-------|---------|-------|-----------------|-------|-------|-------|---------|-------|---------------------------------|--------------|-----------------|-------|-------|-------|---------|-------|---------------------------------|--------------|--|--|
| <i>cdc45+/+/+</i> |       |       |       |         |       | <i>cdc45-/+</i> |       |       |       |         |       |                                 |              | <i>cdc45-/-</i> |       |       |       |         |       |                                 |              |  |  |
|                   | Exp 1 | Exp 2 | Exp 3 | Average | S.D   |                 | Exp 1 | Exp 2 | Exp 3 | Average | S.D   | Comparison to <i>cdc45+/+/+</i> |              |                 | Exp 1 | Exp 2 | Exp 3 | Average | S.D   | Comparison to <i>cdc45+/+/+</i> |              |  |  |
|                   |       |       |       |         |       |                 |       |       |       |         |       | p value                         | Significance |                 |       |       |       |         |       | p value                         | Significance |  |  |
| <b>Log</b>        |       |       |       |         |       | <b>Log</b>      |       |       |       |         |       |                                 |              | <b>Log</b>      |       |       |       |         |       |                                 |              |  |  |
| <b>G1</b>         | 56.09 |       |       |         |       | <b>G1</b>       | 65.64 |       |       |         |       |                                 |              | <b>G1</b>       | 65.37 |       |       |         |       |                                 |              |  |  |
| <b>S</b>          | 16.37 |       |       |         |       | <b>S</b>        | 15.69 |       |       |         |       |                                 |              | <b>S</b>        | 15.01 |       |       |         |       |                                 |              |  |  |
| <b>G2/M</b>       | 25.2  |       |       |         |       | <b>G2/M</b>     | 17.29 |       |       |         |       |                                 |              | <b>G2/M</b>     | 18.41 |       |       |         |       |                                 |              |  |  |
| <b>HU</b>         |       |       |       |         |       | <b>HU</b>       |       |       |       |         |       |                                 |              | <b>HU</b>       |       |       |       |         |       |                                 |              |  |  |
| <b>G1</b>         | 67.85 | 70.18 | 67.79 | 68.61   | 1.363 | <b>G1</b>       | 74.31 | 62.94 | 73.14 | 70.13   | 6.254 | 0.701323                        | ns           | <b>G1</b>       | 69.63 | 63.1  | 66.85 | 66.53   | 3.277 | 0.367469                        | ns           |  |  |
| <b>S</b>          | 16.86 | 18.89 | 17.47 | 17.74   | 1.042 | <b>S</b>        | 11.92 | 18.7  | 10.86 | 13.83   | 4.254 | 0.19659                         | ns           | <b>S</b>        | 16.33 | 18.67 | 17.63 | 17.54   | 1.172 | 0.838676                        | ns           |  |  |
| <b>G2/M</b>       | 14.24 | 9.97  | 14.19 | 12.80   | 2.451 | <b>G2/M</b>     | 13.08 | 17.11 | 15.27 | 15.15   | 2.018 | 0.268472                        | ns           | <b>G2/M</b>     | 12.57 | 17.19 | 14.9  | 14.89   | 2.310 | 0.343653                        | ns           |  |  |
| <b>3h R</b>       |       |       |       |         |       | <b>3h R</b>     |       |       |       |         |       |                                 |              | <b>3h R</b>     |       |       |       |         |       |                                 |              |  |  |
| <b>G1</b>         | 12.01 | 15.42 | 15.75 | 14.39   | 2.071 | <b>G1</b>       | 11.41 | 13.41 | 14.6  | 13.14   | 1.612 | 0.454588                        | ns           | <b>G1</b>       | 66.75 | 59.3  | 65.85 | 63.97   | 4.066 | 0.000047                        | ***          |  |  |
| <b>S</b>          | 59.29 | 56.74 | 54.15 | 56.73   | 2.570 | <b>S</b>        | 60.13 | 59.44 | 60.31 | 59.96   | 0.459 | 0.098521                        | ns           | <b>S</b>        | 17.57 | 21.73 | 18.15 | 19.15   | 2.253 | 0.000045                        | ***          |  |  |
| <b>G2/M</b>       | 28.27 | 25.59 | 29.25 | 27.70   | 1.895 | <b>G2/M</b>     | 27.82 | 26.26 | 24.66 | 26.25   | 1.580 | 0.364268                        | ns           | <b>G2/M</b>     | 14.2  | 17.83 | 15.48 | 15.84   | 1.841 | 0.001472                        | **           |  |  |
| <b>4.5h R</b>     |       |       |       |         |       | <b>4.5h R</b>   |       |       |       |         |       |                                 |              | <b>4.5h R</b>   |       |       |       |         |       |                                 |              |  |  |
| <b>G1</b>         | 9.15  | 6.82  | 10.96 | 8.98    | 2.075 | <b>G1</b>       | 9.54  | 12.8  | 10.65 | 11.00   | 1.657 | 0.258133                        | ns           | <b>G1</b>       | 21.31 | 22.62 | 22.07 | 22.00   | 0.658 | 0.000490                        | ***          |  |  |
| <b>S</b>          | 35.28 | 38.93 | 32.56 | 35.59   | 3.196 | <b>S</b>        | 56.68 | 54.98 | 50.92 | 54.19   | 2.959 | 0.001781                        | **           | <b>S</b>        | 49.98 | 48.27 | 47.06 | 48.44   | 1.467 | 0.003194                        | **           |  |  |
| <b>G2/M</b>       | 54.92 | 53.9  | 56.63 | 55.15   | 1.379 | <b>G2/M</b>     | 33.17 | 31.76 | 38.24 | 34.39   | 3.408 | 0.000612                        | **           | <b>G2/M</b>     | 27.7  | 28.14 | 30.12 | 28.65   | 1.289 | 0.000017                        | ***          |  |  |
| <b>6.5h R</b>     |       |       |       |         |       | <b>6.5h R</b>   |       |       |       |         |       |                                 |              | <b>6.5h R</b>   |       |       |       |         |       |                                 |              |  |  |
| <b>G1</b>         | 9.5   | 10.55 | 11.36 | 10.47   | 0.933 | <b>G1</b>       | 8.14  | 11.08 | 12.81 | 10.68   | 2.361 | 0.894677                        | ns           | <b>G1</b>       | 18.56 | 18.42 | 16.79 | 17.92   | 0.984 | 0.000679                        | **           |  |  |
| <b>S</b>          | 20.95 | 28.92 | 29.24 | 26.37   | 4.697 | <b>S</b>        | 35.54 | 31.6  | 34.24 | 33.79   | 2.008 | 0.065545                        | ns           | <b>S</b>        | 46.72 | 42.18 | 42.82 | 43.91   | 2.457 | 0.004592                        | **           |  |  |
| <b>G2/M</b>       | 66.48 | 60.53 | 59.38 | 62.13   | 3.811 | <b>G2/M</b>     | 57.2  | 57.4  | 52.87 | 55.82   | 2.560 | 0.076031                        | ns           | <b>G2/M</b>     | 34.21 | 38.99 | 37.79 | 37.00   | 2.487 | 0.000667                        | **           |  |  |
| <b>8h R</b>       |       |       |       |         |       | <b>8h R</b>     |       |       |       |         |       |                                 |              | <b>8h R</b>     |       |       |       |         |       |                                 |              |  |  |
| <b>G1</b>         | 32.22 | 32.38 | 33.36 | 32.65   | 0.617 | <b>G1</b>       | 18.99 | 25.75 | 18.04 | 20.93   | 4.204 | 0.008775                        | *            | <b>G1</b>       | 10.47 | 13.77 | 12.61 | 12.28   | 1.674 | 0.000039                        | ***          |  |  |
| <b>S</b>          | 21.42 | 21.68 | 20.85 | 21.32   | 0.425 | <b>S</b>        | 20.69 | 22.46 | 29.32 | 24.16   | 4.558 | 0.343102                        | ns           | <b>S</b>        | 44.4  | 42.22 | 40.04 | 42.22   | 2.180 | 0.000083                        | ***          |  |  |
| <b>G2/M</b>       | 46.53 | 45.62 | 45.5  | 45.88   | 0.563 | <b>G2/M</b>     | 58.43 | 51.61 | 52.46 | 54.17   | 3.717 | 0.01883                         | *            | <b>G2/M</b>     | 44.98 | 43.45 | 47.32 | 45.25   | 1.949 | 0.617423                        | ns           |  |  |
| <b>10h R</b>      |       |       |       |         |       | <b>10h R</b>    |       |       |       |         |       |                                 |              | <b>10h R</b>    |       |       |       |         |       |                                 |              |  |  |
| <b>G1</b>         | 43.27 | 44.52 | 44.42 | 44.07   | 0.695 | <b>G1</b>       | 34.75 | 38.65 | 31    | 34.80   | 3.825 | 0.014495                        | *            | <b>G1</b>       | 8.39  | 12.97 | 12.5  | 11.29   | 2.520 | 0.000027                        | ***          |  |  |
| <b>S</b>          | 26    | 24.33 | 24.75 | 25.03   | 0.869 | <b>S</b>        | 24.34 | 19.77 | 24.08 | 22.73   | 2.567 | 0.216014                        | ns           | <b>S</b>        | 39.85 | 34.09 | 39.36 | 37.77   | 3.193 | 0.002629                        | **           |  |  |
| <b>G2/M</b>       | 28.85 | 30.19 | 29.77 | 29.60   | 0.685 | <b>G2/M</b>     | 41.48 | 41.07 | 44.34 | 42.30   | 1.781 | 0.000324                        | ***          | <b>G2/M</b>     | 52.13 | 53.05 | 47.9  | 51.03   | 2.747 | 0.000196                        | ***          |  |  |
| <b>HU</b>         |       |       |       |         |       | <b>HU</b>       |       |       |       |         |       |                                 |              | <b>HU</b>       |       |       |       |         |       |                                 |              |  |  |
| <b>G1</b>         | 58.49 | 54.27 | 54.35 | 55.70   | 2.414 | <b>G1</b>       | 64.23 | 62.92 | 63.43 | 63.53   | 0.660 | 0.005635                        | **           | <b>G1</b>       | 64.59 | 64.44 | 63.43 | 64.15   | 0.631 | 0.004215                        | **           |  |  |
| <b>S</b>          | 23.87 | 29.15 | 26.37 | 26.46   | 2.641 | <b>S</b>        | 17.94 | 19.05 | 18.46 | 18.48   | 0.555 | 0.006881                        | *            | <b>S</b>        | 19.35 | 19.6  | 18.46 | 19.14   | 0.599 | 0.009409                        | *            |  |  |
| <b>G2/M</b>       | 16.73 | 15.16 | 18.03 | 16.64   | 1.437 | <b>G2/M</b>     | 11.11 | 16.84 | 16.94 | 14.96   | 3.337 | 0.468941                        | ns           | <b>G2/M</b>     | 14.96 | 14.78 | 16.94 | 15.56   | 1.198 | 0.374054                        | ns           |  |  |
| <b>12h R</b>      |       |       |       |         |       | <b>12h R</b>    |       |       |       |         |       |                                 |              | <b>12h R</b>    |       |       |       |         |       |                                 |              |  |  |
| <b>G1</b>         | 58.31 | 45.88 | 46.75 | 50.31   | 6.939 | <b>G1</b>       | 56.47 | 45.39 | 45.81 | 49.22   | 6.279 | 0.849966                        | ns           | <b>G1</b>       | 24.83 | 25.92 | 24.84 | 25.20   | 0.626 | 0.003353                        | **           |  |  |
| <b>S</b>          | 13.58 | 21.56 | 20.48 | 18.54   | 4.329 | <b>S</b>        | 13.53 | 22.18 | 21.7  | 19.14   | 4.861 | 0.881554                        | ns           | <b>S</b>        | 33.28 | 30.73 | 27.64 | 30.55   | 2.824 | 0.015808                        | *            |  |  |
| <b>G2/M</b>       | 26.98 | 31.17 | 31.12 | 29.76   | 2.405 | <b>G2/M</b>     | 28.34 | 30.23 | 30.59 | 29.72   | 1.209 | 0.982305                        | ns           | <b>G2/M</b>     | 40.08 | 42.18 | 45.7  | 42.65   | 2.840 | 0.003876                        | **           |  |  |
| <b>14h R</b>      |       |       |       |         |       | <b>14h R</b>    |       |       |       |         |       |                                 |              | <b>14h R</b>    |       |       |       |         |       |                                 |              |  |  |
| <b>G1</b>         | 57.7  | 58.68 | 58.34 | 58.24   | 0.498 | <b>G1</b>       | 56.8  | 56.85 | 56.6  | 56.75   | 0.132 | 0.007425                        | *            | <b>G1</b>       | 30.05 | 30.82 | 29.23 | 30.03   | 0.795 | 0.000001                        | ***          |  |  |
| <b>S</b>          | 15.99 | 15.64 | 14.24 | 15.29   | 0.926 | <b>S</b>        | 13.61 | 14.07 | 14.09 | 13.92   | 0.272 | 0.07022                         | ns           | <b>S</b>        | 32.74 | 31.78 | 29    | 31.17   | 1.942 | 0.000216                        | ***          |  |  |
| <b>G2/M</b>       | 24.83 | 24.47 | 25.92 | 25.07   | 0.755 | <b>G2/M</b>     | 27.72 | 27.29 | 27.14 | 27.38   | 0.301 | 0.007915                        | *            | <b>G2/M</b>     | 34.98 | 35.03 | 38.96 | 36.32   | 2.284 | 0.001262                        | **           |  |  |
| <b>16h R</b>      |       |       |       |         |       | <b>16h R</b>    |       |       |       |         |       |                                 |              | <b>16h R</b>    |       |       |       |         |       |                                 |              |  |  |
| <b>G1</b>         | 54.22 | 59.07 | 56.47 | 56.59   | 2.427 | <b>G1</b>       | 56.88 | 58.48 | 57.33 | 57.56   | 0.825 | 0.545387                        | ns           | <b>G1</b>       | 45.9  | 46.55 | 45.38 | 45.94   | 0.586 | 0.001794                        | **           |  |  |
| <b>S</b>          | 16.33 | 15.71 | 13.53 | 15.19   | 1.471 | <b>S</b>        | 13.76 | 14.08 | 13.91 | 13.92   | 0.160 | 0.210259                        | ns           | <b>S</b>        | 24.05 | 23.51 | 22.18 | 23.25   | 0.962 | 0.001363                        | **           |  |  |
| <b>G2/M</b>       | 27.65 | 23.89 | 28.34 | 26.63   | 2.395 | <b>G2/M</b>     | 27.3  | 25.99 | 26.63 | 26.64   | 0.655 | 0.993024                        | ns           | <b>G2/M</b>     | 28.16 | 27.85 | 30.54 | 28.85   | 1.472 | 0.242576                        | ns           |  |  |
